# Supplementary material for: The Role of Soluble Low-Density Lipoprotein Receptor-Related Protein-1 in Obstructive Sleep Apnoea
Source: PubMed Central journal article supplement (PMC8038392; doi:10.3390/jcm10071494), 2021-04-03
Supplement: jcm-10-01494-s001.pdf [file jcm-10-01494-s001.pdf]

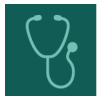

## Supplementary material

**Table S1.** Patients' characteristics among the OSA severity groups.

|                            | Mild<br>(n = 13)    | Moderate<br>(n = 14) | Severe<br>(n = 19)  | <i>p</i> |
|----------------------------|---------------------|----------------------|---------------------|----------|
| Age (years)                | 45 (42-61)          | 61 (52-67)           | 54 (49-63)          | < 0.001  |
| Males (n, %)               | 54                  | 64                   | 79                  | < 0.001  |
| BMI (kg/m <sup>2</sup> )   | 24.77 (23.67-31.25) | 28.84 (25.43-34.93)  | 32.14 (29.63-39.93) | < 0.001  |
| Hypertension (%)           | 46                  | 79                   | 74                  | 0.004    |
| Diabetes (%)               | 8                   | 14                   | 21                  | 0.647    |
| Dyslipidaemia (%)          | 46                  | 29                   | 21                  | 0.471    |
| Cardiovascular disease (%) | 8                   | 7                    | 11                  | 0.968    |
| Cardiac arrhythmia (%)     | 15                  | 21                   | 37                  | 0.243    |
| Smokers (%)                | 31                  | 36                   | 26                  | 0.031    |
| SBP (mmHg)                 | 125.0 (120.0-138.0) | 143.0 (136.5-150.0)  | 134.5 (131.0-141.3) | < 0.001  |
| DBP (mmHg)                 | 76.0 (70.0-80.0)    | 89.0 (84.0-90.0)     | 84.0 (79.5-89.3)    | < 0.001  |
| CRP (mg/l)                 | 2.48 (0.99-3.42)    | 2.06 (1.39-3.71)     | 4.04 (2.75-5.89)    | 0.002    |
| Glucose (mmol/l)           | 4.9 (4.7-5.1)       | 5.3 (5.0-6.6)        | 5.7 (4.9-7.7)       | 0.004    |
| Cholesterol (mmol/l)       | 6.0 (5.4-6.4)       | 5.2 (4.8-6.4)        | 5.5 (5.1-6.1)       | 0.738    |
| HDL-C (mmol/l)             | 1.40 (1.19-1.68)    | 1.26 (1.01-1.50)     | 1.16 (1.08-1.32)    | < 0.001  |
| LDL-C (mmol/l)             | 3.79 ± 0.94         | 3.60 ± 0.96          | 3.44 ± 0.80         | 0.529    |
| Triglyceride (mmol/l)      | 1.47 (1.06-2.02)    | 1.64 (1.27-2.09)     | 1.84 (1.36-2.16)    | 0.025    |
| Lipoprotein (a) (mmol/l)   | 0.46 (0.10-0.70)    | 0.17 (0.01-0.44)     | 0.09 (0.09-0.09)    | 0.965    |
| ApoA1 (g/l)                | 1.48 (1.29-1.68)    | 1.50 (1.29-1.80)     | 1.38 (1.35-1.44)    | 0.340    |
| ApoB (g/l)                 | 1.23 (1.18-1.40)    | 1.16 (0.91-1.32)     | 1.29 (1.11-1.44)    | 0.611    |
| TyG                        | 8.82 ± 0.39         | 8.93 ± 0.51          | 8.98 ± 0.57         | < 0.001  |
| AIP                        | 0.05 ± 0.25         | 0.13 ± 0.25          | 0.15 ± 0.25         | < 0.001  |
| AHI (1/h)                  | 7.7 (6.8-10.4)      | 22.8 (18.4-26.3)     | 42.4 (34.2-59.8)    | < 0.001  |
| ODI (1/h)                  | 6.5 (4.4-8.7)       | 21.1 (14.4-22.1)     | 38.3 (32.5-56.8)    | < 0.001  |
| SPT (min)                  | 456.55 ± 29.98      | 443.60 ± 40.52       | 438.88 ± 55.57      | 0.587    |
| TST (min)                  | 409.55 ± 24.57      | 419.10 ± 25.72       | 419.38 ± 44.03      | 0.640    |
| TST90% (%)                 | 0.3 (0.0-0.7)       | 5.1 (2.8-7.6)        | 16.4 (6.2-40.4)     | < 0.001  |
| MinSatO <sub>2</sub> (%)   | 88.0 (84.0-89.0)    | 81.0 (75.0-83.0)     | 77.0 (69.5-86.0)    | < 0.001  |
| ESS                        | 7 (3-9)             | 6 (5-8)              | 7 (5-10)            | 0.874    |

Data are presented as mean ± standard deviation or median (25-75% percentile). (AHI – apnoea-hypopnoea index, AIP – atherogenic index of plasma, BMI – body mass index, CRP – C-reactive protein, DBP – diastolic blood pressure, ESS – Epworth Sleepiness Scale, HDL-C – high-density lipoprotein cholesterol, LDL-C – low-density lipoprotein cholesterol, MinSatO<sub>2</sub> – minimal oxygen saturation, ODI – oxygen desaturation index, SBP – systolic blood pressure, SPT – sleep period time, TST – total sleep time, TST90% - total sleep time spent with oxygen saturation below 90%, TyG – Triglyceride glucose index)
